1 **Title:** Time trends and factors related to COVID-19 vaccine hesitancy from January-May 2021  
2 among US adults: Findings from a large-scale national survey

3 **Author names and affiliations:**

4 Wendy C King, PhD, Associate Professor, Department of Epidemiology, Graduate School of  
5 Public Health University of Pittsburgh, Pittsburgh, PA, [kingw@edc.pitt.edu](mailto:kingw@edc.pitt.edu)

6 Max Rubinstein, MPP, PhD Student, Heinz College and Department of Statistics & Data Science,  
7 Carnegie Mellon University, Pittsburgh, PA, [mrubinst@andrew.cmu.edu](mailto:mrubinst@andrew.cmu.edu)

8 Alex Reinhart, PhD, Assistant Teaching Professor, Department of Statistics & Data Science,  
9 Carnegie Mellon University, Pittsburgh, PA, [areinhar@stat.cmu.edu](mailto:areinhar@stat.cmu.edu)

10 Robin J. Mejia, MPH, PhD, Special Faculty, Department of Statistics & Data Science, Carnegie  
11 Mellon University, Pittsburgh, PA, [rmejia@andrew.cmu.edu](mailto:rmejia@andrew.cmu.edu)

12 **Abstract**

13 **Word count: 180**

14 **Objective:** To understand COVID-19 vaccine hesitancy.

15 **Methods:** January 6 through May 31, 2021, 5,121,436 US adults completed an online COVID-19  
16 survey. Weighted data was used to evaluate change in vaccine intent and correlates of May  
17 vaccine hesitancy.

18 **Results:** COVID-19 vaccine hesitancy decreased by one-third from January to May, with  
19 relatively large decreases among participants with Black, Pacific Islander or Hispanic  
20 race/ethnicity and  $\leq$ high school education. In May, independent hesitancy risk factors included

21 younger age, non-Asian race, having a PhD or  $\leq$ high school education, living in a rural county,  
22 living in a county with higher 2020 Trump support, lack of worry about COVID-19, working  
23 outside the home, never intentionally avoiding contact with others, and no past-year flu  
24 vaccine. Differences in hesitancy by race/ethnicity varied by age. Almost half of vaccine hesitant  
25 respondents reported fear of side effects and not trusting the COVID-19 vaccine; over one-third  
26 reported not trusting the government, not needing the vaccine, and waiting to see if safe.  
27 Reasons differed by degree of vaccine intent and by race/ethnicity.

28 **Conclusion:** COVID-19 vaccine hesitancy varied by demographics, geography, beliefs, and  
29 behaviors.

30

31 **Main Text Word Count: 3486**

32 **Introduction**

33 The first COVID-19 vaccination was administered in the US on December 14, 2020<sup>1</sup>, 3 days  
34 following the Federal Drug Administration (FDA)'s first Emergency Use Authorization of a  
35 COVID-19 vaccine<sup>2</sup>. By March 2021, 3 COVID-19 vaccines had been authorized in the US<sup>3</sup>, and  
36 the president announced procurement of enough doses for every adult to be vaccinated by the  
37 end of May 2021<sup>4</sup>. By May 2021, vaccine eligibility was expanded to everyone covered under  
38 the FDA authorizations (initially  $\geq 16$  years old, expanded to  $\geq 12$  years old on May 10<sup>5</sup>), and  
39 efforts to increase vaccine access to underserved populations (e.g., rural communities,  
40 homebound individuals) were underway<sup>6,7</sup>. However, vaccine hesitancy (i.e., a refusal or  
41 reluctance to be vaccinated) slowed vaccination uptake, potentially prolonging the pandemic<sup>3</sup>.

42 A longitudinal study of US adults (N=7,420) by Daly et al. reported an overall decrease in COVID-  
43 19 vaccine hesitancy from 46.0% in October 2020 to 35.2% in March 2021, with larger  
44 decreases in Black and Hispanic versus White race/ethnicity<sup>8</sup>, thereby reducing the racial  
45 disparity in COVID-19 vaccine hesitancy. However, if and how vaccine hesitancy has changed  
46 during the first five months of the US COVID-19 vaccine rollout, overall and among subgroups,  
47 is largely unstudied.

48 Among a massive sample of US adults, we report COVID-19 vaccine uptake and intent by  
49 month, January-May, 2021, and evaluate time trends by race/ethnicity, education, US region  
50 and political environment. For May, the prevalence of COVID-19 vaccine hesitancy is reported  
51 by demographics, geographic factors, political/COVID-19 environment, health status, beliefs

52 and behaviors, and associations between each potential risk factor with hesitancy is estimated  
53 with and without adjustment for potential confounders. Lastly, we identify the most common  
54 reasons for COVID-19 vaccine hesitancy by level of COVID-19 vaccine intent and race/ethnicity.

## 55 **Methods**

56 This analysis used the COVID Trends and Impact Survey (CTIS)<sup>9</sup>, created by the Delphi Group at  
57 Carnegie Mellon University (CMU) and conducted in collaboration with Facebook Data for  
58 Good. Survey sampling is described in the **eMethods**. Survey weights accounting for the  
59 sampling design and non-response are post-stratified to match the US general population by  
60 age, gender, and state<sup>10</sup>. The study design ensures CMU researchers do not see usernames or  
61 profile information and Facebook does not see survey microdata.

62 *Study sample.* The analysis sample includes 5,121,436 survey responses from participants who  
63 completed the survey at least once January 6 to May 31, 2021; study flow for each month is  
64 provided in the **eTable 1**. Data was aggregated by month to evaluate time trends in COVID-19  
65 vaccine receipt and intent. To inform policy and public health efforts we used the most recent  
66 month's data (May 2021) to assess how demographics, geographic factors, political/COVID-19  
67 environment, health status, beliefs and behaviors relate to COVID-19 vaccine hesitancy.

### 68 *Measures.*

69 Participants were asked if they had received the COVID-19 vaccine, and if not, "If a vaccine to  
70 prevent COVID-19 (coronavirus) were offered to you today, would you choose to get  
71 vaccinated." Participants were categorized as vaccine hesitant if they answered that they  
72 probably or definitely would not choose to get vaccinated (versus probably or definitely would

73 choose to get vaccinated or were vaccinated). Those who had already received the vaccine  
74 were coded as not hesitant in order to reduce bias from differential access to a COVID-19  
75 vaccine among subgroups over the time studied.

76 The survey questions and response sets utilized in this report to measure demographics,  
77 geographic factors, political/COVID-19 environment, health status, beliefs and behaviors are  
78 provided in the **eAppendix**. The categorization of survey variables and creation of derived  
79 variables (US Census region, state governor political party, county Trump to Biden vote share in  
80 the 2020 presidential election, and county COVID-19 death rate) are described in the  
81 **eMethods**.

82 *Statistical analysis.* Weighted percentages of COVID-19 vaccine receipt and intent were  
83 calculated by month for the full sample and by categories of race/ethnicity, education, US  
84 Census region, and county Trump to Biden vote share. Percentages were plotted by month and  
85 first-last month differences were calculated. The race/ethnicity comparison was limited to  
86 adults 18-34 years due to an interaction between race/ethnicity and age in relation to COVID-  
87 19 vaccine hesitancy (reported below with May data), and because hesitancy is higher among  
88 younger versus older adults.

89 Among the May sample, weighted percentages of COVID-19 vaccine hesitancy were calculated  
90 by all covariates (demographics, geographic factors, political/COVID-19 environment, health  
91 status, beliefs and behaviors) and a series of weighted Poisson regression models were used to  
92 estimate the risk ratios (RR) for vaccine hesitancy for each variable. Adjusted risk ratios (aRR)  
93 were estimated from a single weighted Poisson regression model including all covariates and an

94 interaction term for age group and race/ethnicity. In a second multivariable model, a simplified  
95 health conditions variable (none, at least one; described in **eMethods**) was replaced with the  
96 version specifying specific conditions to estimate aRR by condition.

97 Finally, weighted percentages for reasons for hesitancy were calculated by level of COVID-19  
98 vaccine intent, and by race/ethnicity among hesitant respondents. For all parameters, 95%  
99 confidence intervals (CI) were calculated using robust standard errors.<sup>8</sup> Analyses were  
100 conducted in R (Version 4.0.2, R Core Team, Vienna, Austria).

## 101 **Results**

102 *Participant characteristics.* May participants (N= 529,658) had a median age range of 55-64  
103 years, 45.0% identified as male, 52.6% female, 1.1% nonbinary, and 1.4% self-described gender;  
104 16.7% were Hispanic, 68.7 % White, 6.5% Black, 3.6% Asian, 0.9% Native American, 0.2% Pacific  
105 Islander, and 3.4% were multi-racial; 22.5% had ≤high school education; 41.2% a four-year  
106 college degree or higher. Over half (55.7%) worked for pay; 43.2% worked outside the home.  
107 Demographics were similar in January through April (data not shown).

108 *COVID-19 vaccine receipt and intent over time.* Hesitancy decreased each month, with a one-  
109 third decrease from 25.7% (95%CI 25.6-25.8) in January to 17.1% (95% CI, 17.0-17.2) in May,  
110 2021 (**eFigure 1**). There was a bigger decrease in the response “probably not” (-7.0 percentage  
111 points (%) [95% CI -7.1, -6.9]) versus “definitely not” (-1.6 % [95% CI -1.7, -1.4]) (**eTable 2**).

112 *Disparities in COVID-19 vaccine hesitancy over time.* Per **Figure 1**, from January to May the gap  
113 in percent hesitant between race/ethnicity groups among younger adults (panel A) and  
114 education levels among all respondents (panel B) decreased, with the biggest decreases among

115 two of the three most hesitant race/ethnicity groups (e.g., Black and Pacific Islanders but not  
116 Native American) and the two most hesitant education groups ( $\leq$ high school and some college  
117 education) in January. There was not a decrease in hesitancy among those with a professional  
118 degree or PhD. Changes in percent hesitant over time were fairly similar across US Census  
119 regions (panel C); however, there was less of a decrease in the Midwest and Mountain regions  
120 versus the South, Pacific and Northeast. The gap in percent hesitant by county Trump vote  
121 share increased slightly from January to May, with the highest quartile, which was the most  
122 hesitant group, having the smallest decrease (panel D). Supporting data is provided in **eTable 3.**  
123 *Factors related to COVID-19 vaccine hesitancy.* Hesitancy in May, 2021 is reported by  
124 participant demographics and geographic factors in **Table 1**. Although hesitancy was lower in  
125 females versus males (RR=0.79, 95% CI 0.78, 0.81), with adjustment for covariates (i.e.,  
126 variables reported in **Tables 1 and 2**), female versus male gender was associated with higher  
127 hesitancy (aRR=1.12, 95%CI 1.10-1.14). In contrast, non-binary adults had similar hesitancy to  
128 males (RR=1.10, 95%CI, 0.97-1.22; aRR=0.99, 95%CI 0.88-1.10).

129 In general, younger age and non-Asian race (particularly Multi-racial and Native American),  
130 were related to greater hesitancy. However, an interaction was observed between age and  
131 race/ethnicity categories (**Figure 2**). Differences in hesitancy by age (e.g., 18-24 year-olds versus  
132 65-74 year-olds) were more pronounced in Blacks (RR=7.23 [95%CI, 5.89-8.57]) and less  
133 pronounced in Asians (RR=2.39 [95%CI 1.01-3.76]; although hesitancy <5% in all Asian age  
134 groups) compared to Whites (RR=2.94 [95%CI 2.79-3.09]). Differences in hesitancy by  
135 race/ethnicity were more pronounced in younger adults and adults  $\geq$ 75 years. Furthermore, for  
136 some comparisons, the direction of the difference in hesitancy by race/ethnicity differed by

137 age. For example, for Blacks versus Whites the RR of hesitancy was 1.28 (95%CI, 1.09-1.47) in  
138 18-24 year olds, and 0.52 (95%CI 0.46-0.59) in 64-75 year olds. RRs for age groups stratified by  
139 race/ethnicity groups and for race/ethnicity groups stratified by age groups, with and without  
140 adjustment for all covariates, are provided in **eTable 4** and **5**. In general, age and race/ethnicity  
141 differences were attenuated in the full multivariable model, but still present.

142 The association between hesitancy and education level followed a U-shaped curve with the  
143 lowest hesitancy among those with a master's degree (RR=0.75 [95% CI 0.72-0.78]) and the  
144 highest hesitancy among those with a PhD (RR=2.16 [95%CI 2.05-2.28]) or ≤high school  
145 education (RR=1.88 [95%CI 1.83-1.93]) versus a bachelor's degree. Additional demographic risk  
146 factors for hesitancy included working outside the home (RR=2.48 [95%CI 2.39-2.57]) or not  
147 working for pay (RR=1.49 [95% CI: 1.43-1.54]) versus working at home, living in the South  
148 (RR=1.59 95%CI 1.55-1.64]), Midwest (RR=1.50 [95%CI 1.46-1.55]) or Mountain (RR=1.49 [95%CI  
149 1.43-1.55]) versus the Pacific US region, and in a less urban county (e.g., RR=2.34 [95 CI, 2.27-  
150 2.41] for non-core versus large central metro). Associations were attenuated with adjustment,  
151 but remained (**Table 1**).

152 COVID-19 vaccine hesitancy is reported by indicators of political/COVID-19 environment, health  
153 status, beliefs and behaviors in **Table 2**. Risk factors for hesitancy were living in a state with  
154 Republican versus Democratic governor (RR= 1.33 [95%CI 1.31-1.36]), living in a county with a  
155 relatively higher Trump vote share (e.g., RR= 2.55 [95%CI 2.48-2.62] for highest versus lowest  
156 quartile), living in a county with a relatively lower April COVID-19 death rate (e.g. RR=0.70  
157 [95%CI 0.68-0.73] for highest versus lowest quartile), history versus no history of a positive  
158 COVID-19 test (RR= 1.24 (95%CI 1.22-1.27)), not having versus having a high-risk health



159 condition (RR=1.41 [95%CI 1.39-1.43]), being less worried about self or immediate family  
160 becoming seriously ill from COVID-19 (e.g., RR=3.82 [3.74-3.91] for not worried at all versus  
161 worried), not having had versus having had a past-year flu vaccination (RR=5.06 [95%CI 4.94-  
162 5.18]), and not avoiding versus avoiding contact with others (e.g., RR=4.03 [95%CI 3.92-4.15] for  
163 none versus all of the time). Political affiliation of state governor was excluded from the  
164 multivariable model due to collinearity with county Trump vote share. The adjusted  
165 associations were attenuated but in the same direction, except for April 2021 COVID-19 death  
166 rate, which was not independently related to hesitancy.

167 COVID-19 vaccine hesitancy by specific health conditions is provided in **eTable 6**. Compared to  
168 participants reporting none of the queried high-risk health conditions, hesitancy was lower  
169 among participants with each health condition category except weakened or compromised  
170 immune system (RR 1.09, [95%CI 1.00-1.17]; aRR 1.41 [95%CI 1.32-1.51]). Most health  
171 condition associations were attenuated with adjustment.

172 *Reasons for COVID-19 vaccine hesitancy.* Reasons for hesitancy by level of intent (definitely not  
173 - probably yes) are reported in **Table 3**. Concern about side effects was chosen most frequently  
174 at 49.2% (95%CI, 48.8-49.7) among all hesitant participants, and similarly common among all  
175 levels of intent. In contrast, not trusting the COVID-19 vaccine and not trusting the government  
176 were the most frequent reasons for hesitancy among adults who would “definitely not” choose  
177 to be vaccinated today (59.6 % [95%CI, 59.0-60.1] and (52.3% [95%CI, 51.7-52.8], respectively),  
178 double the prevalence seen among the “probably not” group and almost quadruple the  
179 prevalence the “probably yes” group. Conversely, 52.2% (95%CI, 51.5- 53.0) of the “probably  
180 not” group said they would wait to see if it was safe, versus only 24.2% (95%CI, 23.7-24.8) of

181 the “definitely not” group. Compared to most reasons for vaccine hesitancy (i.e., the reasons  
182 listed above plus don’t need, concerned about allergic reaction, don’t know if it will work), not  
183 liking vaccines in general was chosen less frequently overall and among subgroups (<20% for  
184 all).

185 Reasons for COVID-19 vaccine hesitancy among hesitant US adults by race/ethnicity are  
186 provided in **eTable 7**. Concern about side effects, followed by not trusting the COVID-19  
187 vaccine, were the most common concerns in all race/ethnicity groups, with the ranking  
188 reversed among Native Americans. Both were chosen by >40% of each group except Asians  
189 (39.3% [95%CI, 32.3, 46.3]) reported not trusting the COVID-19 vaccine). There was more  
190 racial/ethnicity variability in not trusting the government, which was highest among Multiracial  
191 adults (52.4% [95%CI, 50.2-54.5]), followed by Native Americans (44.0% [95%CI, 39.5-48.5]),  
192 Whites (43.7% [95%CI, 43.2-44.3], and Hispanics (41.0% [95%CI, 39.5-42.6]); in waiting to see if  
193 safe, which was highest in Hispanics (41.6%, 95%CI, 40.1-43.2), followed by Asians (40.8%  
194 [95%CI, 33.8-47.7]) and Blacks (40.7% [95%CI, 38.6-42.8]); and in do not need, which was  
195 highest in Multiracial (48.5% [95%CI, 46.3-50.7]), and Whites (42.1% [95%CI, 41.5-42.7]). Other  
196 reasons were chosen by <40% of hesitant adults in each race/ethnicity group.

## 197 **Discussion**

198 In this massive national survey of US adults, COVID-19 vaccine hesitancy decreased by one-third  
199 between January and May, 2021. A reduction in hesitancy was observed across all  
200 race/ethnicity groups, US regions and county political environments, and most education levels,  
201 though subgroups decreased at different rates, with large variations by race/ethnicity and

202 education groups. The reduction in hesitancy was primarily due to a decrease in the  
203 percentage responding they would “probably not” accept the vaccine, as there was minimal  
204 change in the percentage “definitely not”. May 2021 data indicates that five months into the US  
205 COVID-19 vaccine rollout, a wide array of demographic, health, political and COVID-19  
206 environment, beliefs and behavioral factors independently contribute to COVID-19 vaccine  
207 hesitancy: age, race/ethnicity, education, county urban classification, county political  
208 environment, extent of worry about a serious illness from COVID-19, extent intentionally  
209 avoiding contact with others, and past-year flu vaccine history chief among them. Additionally,  
210 important differences in reasons for COVID-19 vaccine hesitancy exist both by degree of vaccine  
211 intent and racial/ethnic groups.

212 Large decreases January-May in COVID-19 vaccine hesitancy among Blacks and Pacific Islanders  
213 led to these groups joining Asian and Hispanics as having a lower prevalence of hesitancy than  
214 Whites (all age groups combined) in May 2021. Racial/ethnic disparities have been observed in  
215 all aspects of the COVID-19 pandemic, with communities of color experiencing higher rates of  
216 SARS-CoV-2 infection (despite higher positivity rates indicative of lower access to testing<sup>11</sup>),  
217 COVID-19-related hospitalizations and mortality<sup>11</sup>. Racial/ethnic disparities in COVID-19 vaccine  
218 acceptance at the start of the vaccine rollout threatened to continue this trend. However, many  
219 groups from at-risk communities initiated targeted outreach campaigns<sup>12</sup>. Our finding that  
220 racial/ethnic disparities in COVID-19 hesitancy are decreasing suggests that messaging and  
221 outreach campaigns, combined with the opportunity to observe initial months of the rollout,  
222 have had positive effects. However, vaccination rates for Black and Hispanics continued to lag

223 through July 6, 2021<sup>13</sup>, indicating that further efforts are needed to overcome barriers to access  
224 for at-risk communities.

225 Most previous studies of COVID-19 vaccine hesitancy grouped Asians with American  
226 Indian/Alaska Native, Native Hawaiian or other Pacific Islanders<sup>8,14-16</sup> However, our study,  
227 which included 12,012 Asian participants, identified a remarkably lower prevalence of hesitancy  
228 in this race/ethnicity group versus all others. This study also identified a race/ethnicity by age  
229 interaction, yielding greater insight into the gross patterns of each factor, which had previously  
230 been identified as key predictors of vaccine hesitancy<sup>8,17</sup>. For example, Blacks have relatively  
231 high hesitancy among adults under 35 years while Whites have relatively high hesitancy among  
232 adults 45 and older. In contrast, Native Americans and Multi-racial groups have particularly high  
233 hesitancy, and Asians low hesitancy, across age groups.

234 The large decrease in COVID-19 vaccine hesitancy January-May among those with ≤high school  
235 education went a long way towards narrowing the education gap; still this group has a relatively  
236 high hesitancy prevalence. Those with professional degrees (e.g., JD, MBA) and PhDs were the  
237 only education groups without a decrease in hesitancy, and by May, those with PhDs had the  
238 highest hesitancy. To our knowledge, no other study has evaluated education with this level of  
239 granularity, which was possible due to our unusually large sample size (>10,000 participants  
240 with PhDs). Further investigation into hesitancy among those with a PhD is warranted.

241 January-May, there was a dose-response relationship between relative degree of local Trump  
242 support in the 2020 presidential election and hesitancy, that grew slightly over time such that

243 by May those living in counties in the top quartile were 42% more at risk for being hesitant,  
244 highlighting the politicization of public health recommendations.

245 Adults who were “not worried at all” about themselves or someone in their family becoming  
246 seriously ill from COVID-19 or who were not intentionally avoiding contact with others had  
247 much higher likelihood of COVID-19 vaccine hesitancy, as did those working outside the home.  
248 These latter two findings are particularly concerning as they indicate non-vaccinated (versus  
249 vaccinated) individuals may be more likely to engage in activities in which transmission can  
250 occur. While prior studies have linked history of past-year flu vaccine with hypothetical COVID-  
251 19 vaccine acceptance<sup>14,16</sup>, our finding that those who had not received a flu vaccine were 224%  
252 more likely to be COVID-19 vaccine hesitant, after controlling for such a wide array of  
253 covariates, is striking.

254 Even prior to COVID-19, vaccine hesitancy was identified as one of the top ten global health  
255 threats by the World Health Organization (WHO)<sup>18</sup>. This is because incomplete vaccine coverage  
256 increases the risk of disease for the entire population<sup>19</sup>. This study’s county-level variables raise  
257 concerns, as high hesitancy areas could provide reservoirs for the Sars-CoV2 virus, even if  
258 national or state level vaccination rates increase.

259 Five months into the vaccine rollout, concern about side effects was common across levels of  
260 COVID-19 vaccine intent (49%) and among all racial groups (range: 42-58%). However, several  
261 reasons for COVID-19 vaccine hesitancy varied substantially by groups. For example, those who  
262 would definitely not versus probably not choose to be vaccinated were about twice as likely to  
263 say they don’t trust the COVID-19 vaccine, don’t trust the government, and/or don’t need the

264 vaccine. Conversely, those who would probably not versus definitely not choose to be  
265 vaccinated were twice as likely to say that they are waiting to see if it will be safe and might  
266 take it later.

267 *Limitations and Strengths.* The study employs a novel sampling method with a soft ask and low  
268 response rate, the effect of which has not yet been fully studied. Survey weights adjust for non-  
269 response and coverage bias (i.e., matching the sample to gender, age, and geographic profile of  
270 the US). However, a comparison with the American Community Survey<sup>20</sup> shows our sample is  
271 more educated with higher vaccine uptake than general population, indicating that vaccine  
272 hesitancy is underestimated in this sample. Importantly, these characteristics have been  
273 consistent over time. CTIS results follow similar patterns observed by others,<sup>8</sup> and have been  
274 helpful for tracking trends, understanding associations and informing policies<sup>21,22</sup>. Demographic  
275 questions were asked at the end of the survey and had high unit non-response (e.g., 12% for  
276 age), which was treated as a category in analysis. Additionally, we assume the survey was  
277 completed in good faith. However, a review of fill-in responses for self-described gender  
278 suggest a small percentage of participants used that category to make political statements (e.g.,  
279 trans-phobic comments). A sensitivity analysis eliminating respondents with self-described  
280 gender produced very similar results, though the increase in hesitancy for those age  $\geq 75$  years  
281 was attenuated (data not shown). A strength of our novel sampling method is that it yielded a  
282 large sample with diverse characteristics that enabled detailed subgroup analyses that  
283 identified new findings (e.g., non-binary and male genders had similar hesitancy prevalence).  
284 Additionally, while a previous study evaluated changes in hesitancy by age, sex, education, or  
285 income level, October 2020 through March 2021<sup>8</sup>, estimated change by these categories had

286 large overlapping 95% CI, likely in part reflecting the much smaller sample size. Further, the  
287 racial and education categories (White, Hispanic, Black, Other; and Yes/No College Degree)  
288 collapsed groups in which we have identified meaningful differences.

289 In the US, the COVID-19 vaccination campaign has moved from an initial phase of scarcity,  
290 where equity concerns guided access, to a phase of abundance, where messaging and attention  
291 to barriers to access is essential to equity, and where increasing vaccine acceptance is critical to  
292 achieving herd immunity. Better understanding of reasons for hesitancy among subgroups,  
293 combined with up-to-date information on hesitancy by demographics, political environment,  
294 and individual health, behaviors and beliefs can help policy makers achieve these goals.

295 Particularly hesitant subgroups include Native American and Multi-racial groups of all ages, and  
296 White and Blacks adults <35 years; adults with  $\leq$ high school education or PhDs; adults living in  
297 small metro, micropolitan or non-core urban (rural) counties or counties with high Trump  
298 support; adults with a history of a positive COVID-19 test; not worried about serious illness  
299 from COVID-19; working outside the home; never intentionally avoiding contact with others;  
300 and adults who did not receive a past-year flu vaccination. Among participants who said they  
301 probably would not get vaccinated today, messaging about safety and policy interventions to  
302 address downstream impacts of vaccine side effects, such as potential lost work, could be  
303 impactful. However, among those who definitely would not get vaccinated today, results  
304 suggest the existence of a subgroup with entrenched hesitancy and high distrust of government  
305 that may be hard to reach.

**Table 1.** COVID-19 vaccine hesitancy in May 2021 by demographics among US adults (N=529,658)

|                       | Sample |      | COVID-19 vaccine hesitant |                   |                   |
|-----------------------|--------|------|---------------------------|-------------------|-------------------|
|                       | n      | %    | % (95% CI)                | RR (95% CI)       | Adj. RR (95% CI)  |
| <b>Gender</b>         |        |      |                           |                   |                   |
| Male                  | 159427 | 30.1 | 16.6 (16.4, 16.9)         | 1.0 (NA)          | 1.0 (NA)          |
| Female                | 294983 | 55.7 | 13.2 (13.1, 13.4)         | 0.79 (0.78, 0.81) | 1.12 (1.10, 1.14) |
| Non-binary            | 3232   | 0.6  | 18.2 (16.1, 20.3)         | 1.10 (0.97, 1.22) | 0.99 (0.88, 1.10) |
| Self-described        | 4014   | 0.8  | 64.2 (62.3, 66.1)         | 3.86 (3.73, 3.99) | 1.42 (1.37, 1.47) |
| Missing               | 68002  | 12.8 | 26.3 (25.8, 26.7)         | 1.58 (1.54, 1.61) | 1.39 (1.34, 1.44) |
| <b>Age group</b>      |        |      |                           |                   |                   |
| 18-24 years           | 15678  | 3.0  | 22.9 (22.1, 23.7)         | 2.79 (2.67, 2.91) | <sup>b</sup>      |
| 25-34 years           | 52640  | 9.9  | 21.3 (20.8, 21.7)         | 2.60 (2.52, 2.68) |                   |
| 35-44 years           | 73245  | 13.8 | 18.4 (18.1, 18.8)         | 2.25 (2.18, 2.32) |                   |
| 45-54 years           | 81578  | 15.4 | 17.0 (16.7, 17.3)         | 2.07 (2.01, 2.13) |                   |
| 55-64 years           | 103380 | 19.5 | 12.9 (12.7, 13.1)         | 1.57 (1.53, 1.62) |                   |
| 65-74 years           | 95964  | 18.1 | 8.2 (8.0, 8.4)            | 1.0 (NA)          |                   |
| ≥ 75 years            | 42657  | 8.1  | 9.8 (9.4, 10.2)           | 1.20 (1.14, 1.25) |                   |
| Missing               | 64516  | 12.2 | 24.6 (24.1, 25.0)         | 3.00 (2.91, 3.09) |                   |
| <b>Race/ethnicity</b> |        |      |                           |                   |                   |
| White                 | 338578 | 63.9 | 15.8 (15.6, 16.0)         | 1.0 (NA)          | <sup>b</sup>      |
| Hispanic              | 57608  | 10.9 | 13.4 (13.0, 13.7)         | 0.85 (0.82, 0.87) |                   |
| Black                 | 28625  | 5.4  | 13.0 (12.5, 13.5)         | 0.82 (0.79, 0.86) |                   |
| Asian                 | 12012  | 2.3  | 3.2 (2.8, 3.6)            | 0.20 (0.17, 0.23) |                   |
| Native American       | 3993   | 0.8  | 25.3 (23.4, 27.2)         | 1.60 (1.48, 1.72) |                   |
| Pacific Islander      | 1002   | 0.2  | 13.9 (11.3, 16.5)         | 0.88 (0.71, 1.04) |                   |



|                             |        |       |                   |                   |                   |
|-----------------------------|--------|-------|-------------------|-------------------|-------------------|
| Multi-racial                | 13433  | 2.5   | 29.2 (28.2, 30.2) | 1.85 (1.78, 1.92) |                   |
| Missing                     | 74407  | 14.0  | 26.5 (26.1, 27.0) | 1.68 (1.65, 1.71) |                   |
| Education level             |        |       |                   |                   |                   |
| ≤ High school               | 92557  | 17.5  | 20.8 (20.4, 21.1) | 1.88 (1.83, 1.93) | 1.56 (1.52, 1.60) |
| Some college                | 167096 | 31.5  | 18.3 (18.1, 18.6) | 1.66 (1.62, 1.70) | 1.37 (1.34, 1.40) |
| Bachelor's                  | 110944 | 20.9  | 11.0 (10.8, 11.3) | 1.0 (NA)          | 1.0 (NA)          |
| Master's                    | 62862  | 11.9  | 8.3 (8.1, 8.6)    | 0.75 (0.72, 0.78) | 0.90 (0.87, 0.92) |
| Professional (e.g., JD)     | 14970  | 2.8   | 12.3 (11.6, 13.0) | 1.12 (1.05, 1.18) | 1.09 (1.04, 1.15) |
| PhD                         | 10969  | 2.1   | 23.9 (22.7, 25.1) | 2.16 (2.05, 2.28) | 1.20 (1.14, 1.25) |
| Missing                     | 70260  | 13.3  | 23.9 (23.5, 24.3) | 2.16 (2.10, 2.22) | 1.18 (1.10, 1.25) |
| Employment status           |        |       |                   |                   |                   |
| Work outside home           | 176197 | 33.3  | 21.2 (20.9, 21.4) | 2.48 (2.39, 2.57) | 1.33 (1.28, 1.37) |
| Work at home                | 57246  | 10.8  | 8.5 (8.2, 8.8)    | 1.0 (NA)          | 1.0 (NA)          |
| Does not work for pay       | 223071 | 42.1  | 12.7 (12.5, 12.9) | 1.49 (1.43, 1.54) | 1.34 (1.29, 1.38) |
| Missing                     | 73144  | 13.8  | 23.9 (23.5, 24.3) | 2.80 (2.69, 2.91) | 1.33 (1.25, 1.41) |
| US Region                   |        |       |                   |                   |                   |
| Midwest                     | 126686 | 23.9  | 18.1 (17.9, 18.4) | 1.50 (1.46, 1.55) | 1.10 (1.07, 1.13) |
| South                       | 182852 | 34.5  | 19.2 (19.0, 19.5) | 1.59 (1.55, 1.64) | 1.13 (1.10, 1.16) |
| Pacific                     | 73521  | 13.9  | 12.1 (11.7, 12.4) | 1.0 (NA)          | 1.0 (NA)          |
| Mountain                    | 42261  | 8.0   | 17.9 (17.4, 18.5) | 1.49 (1.43, 1.55) | 1.11 (1.07, 1.15) |
| Northeast                   | 88229  | 16.7  | 12.6 (12.3, 12.9) | 1.04 (1.01, 1.08) | 0.96 (0.93, 0.99) |
| Territories                 | 191    | <0.05 | 12.0 (6.3, 17.8)  | 1.00 (0.52, 1.48) | 0.64 (0.44, 0.84) |
| Missing                     | 15918  | 3.0   | 33.3 (32.3, 34.3) | 2.76 (2.64, 2.87) | °                 |
| County urban classification |        |       |                   |                   |                   |

|                     |        |      |                   |                   |                   |
|---------------------|--------|------|-------------------|-------------------|-------------------|
| Large central metro | 120722 | 22.8 | 11.7 (11.5, 12.0) | 1.0 (NA)          | 1.0 (NA)          |
| Large fringe metro  | 115854 | 21.9 | 14.3 (14.0, 14.5) | 1.22 (1.18, 1.25) | 1.03 (1.01, 1.06) |
| Medium metro        | 138457 | 26.1 | 16.8 (16.5, 17.1) | 1.43 (1.39, 1.47) | 1.13 (1.10, 1.16) |
| Small metro         | 57778  | 10.9 | 21.0 (20.6, 21.5) | 1.79 (1.74, 1.85) | 1.18 (1.15, 1.22) |
| Micropolitan        | 49266  | 9.3  | 24.2 (23.7, 24.7) | 2.06 (2.00, 2.12) | 1.19 (1.15, 1.23) |
| Non-core            | 31472  | 5.9  | 27.4 (26.8, 28.1) | 2.34 (2.27, 2.41) | 1.23 (1.19, 1.27) |
| Missing             | 16109  | 3.0  | 33.0 (32.0, 34.0) | 2.82 (2.71, 2.92) | <sup>c</sup>      |

---

Juris Doctorate= JD; NA=not applicable, NH=Non-Hispanic

<sup>a</sup> Race/ethnicity groups other than the group labeled “Hispanic” are non-Hispanic.

<sup>b</sup> Due to an interaction between age group and race/ethnicity, adjusted relative risks from the multivariable model are reported in supplemental digital content (age group stratified by race/ethnicity in eTable 4; race/ethnicity by age group in eTable 5).

<sup>c</sup> Reliable estimates could not be calculated for the missing category for variables based on participants’ zip code, due to collinearity.

**Table 2.** COVID-19 vaccine hesitancy in May 2021 political/by COVID-19 environment, health status, beliefs and behaviors among US adults (N=529,658)

|                                                                              | Sample |      | COVID-19 vaccine hesitant |                   |                   |
|------------------------------------------------------------------------------|--------|------|---------------------------|-------------------|-------------------|
|                                                                              | N      | %    | % (95% CI)                | RR (95% CI)       | Adj. RR (95% CI)  |
| State governor's political party                                             |        |      |                           |                   |                   |
| Democratic                                                                   | 282446 | 53.3 | 14.4 (14.2, 14.6)         | 1.0 (NA)          | <sup>a</sup>      |
| Republican                                                                   | 230264 | 43.5 | 19.2 (19.0, 19.4)         | 1.33 (1.31, 1.36) |                   |
| Missing                                                                      | 16948  | 3.2  | 31.8 (30.8, 32.7)         | 2.21 (2.13, 2.28) |                   |
| County Trump vote total minus Biden vote total in 2020 presidential election |        |      |                           |                   |                   |
| Lowest quartile                                                              | 343255 | 64.8 | 12.8 (12.6, 12.9)         | 1.0 (NA)          | 1.0 (NA)          |
| Second lowest quartile                                                       | 101627 | 19.2 | 21.9 (21.6, 22.3)         | 1.72 (1.69, 1.75) | 1.27 (1.25, 1.30) |
| Second highest quartile                                                      | 47422  | 9.0  | 27.6 (27.0, 28.1)         | 2.16 (2.11, 2.21) | 1.34 (1.30, 1.37) |
| Highest quartile                                                             | 19712  | 3.7  | 32.5 (31.7, 33.4)         | 2.55 (2.48, 2.62) | 1.42 (1.38, 1.47) |
| Missing                                                                      | 17642  | 3.3  | 32.4 (31.5, 33.4)         | 2.54 (2.46, 2.62) | <sup>b</sup>      |
| County COVID-19 April 2021 county death rate                                 |        |      |                           |                   |                   |
| Lowest quartile                                                              | 26160  | 4.9  | 24.3 (23.7, 25.0)         | 1.0 (NA)          | 1.0 (NA)          |
| Second lowest quartile                                                       | 168948 | 31.9 | 16.2 (15.9, 16.4)         | 0.66 (0.64, 0.69) | 0.97 (0.94, 1.00) |
| Second highest quartile                                                      | 214630 | 40.5 | 15.7 (15.5, 15.9)         | 0.65 (0.63, 0.67) | 1.00 (0.97, 1.03) |
| Highest quartile                                                             | 103804 | 19.6 | 17.1 (16.8, 17.4)         | 0.70 (0.68, 0.73) | 1.01 (0.98, 1.04) |
| Missing                                                                      | 16116  | 3.0  | 33.0 (32.0, 34.0)         | 1.36 (1.30, 1.41) | <sup>b</sup>      |
| Ever tested positive for COVID-19                                            |        |      |                           |                   |                   |
| Yes                                                                          | 55851  | 10.5 | 20.7 (20.2, 21.1)         | 1.24 (1.22, 1.27) | 1.10 (1.08, 1.13) |
| No or unsure                                                                 | 470576 | 88.8 | 16.6 (16.5, 16.8)         | 1.0 (NA)          | 1.0 (NA)          |
| Missing                                                                      | 3231   | 0.6  | 19.6 (17.8, 21.4)         | 1.18 (1.07, 1.29) | 0.94 (0.86, 1.01) |
| Ever diagnosed with high-risk medical condition                              |        |      |                           |                   |                   |

|                                                                                                 |        |      |                   |                   |                       |
|-------------------------------------------------------------------------------------------------|--------|------|-------------------|-------------------|-----------------------|
| One or more conditions                                                                          | 324323 | 61.2 | 13.8 (13.6, 13.9) | 1.0 (NA)          | 1.0 (NA)              |
| No condition                                                                                    | 184503 | 34.8 | 19.4 (19.2, 19.7) | 1.41 (1.39, 1.43) | 1.01 (0.99, 1.02)     |
| Missing                                                                                         | 20832  | 3.9  | 35.9 (35.0, 36.8) | 2.60 (2.53, 2.67) | 1.70 (1.65, 1.75)     |
| Someone 65 years or older in the home                                                           |        |      |                   |                   |                       |
| Is ≥65 years                                                                                    | 138621 | 26.2 | 8.7 (8.5, 8.9)    | 1.0 (NA)          | 1.0 (NA) <sup>c</sup> |
| Yes                                                                                             | 47859  | 9.0  | 18.0 (17.5, 18.5) | 2.07 (2.00, 2.14) |                       |
| No                                                                                              | 204999 | 38.7 | 18.1 (17.9, 18.3) | 2.08 (2.03, 2.13) | 1.07 (1.04, 1.09)     |
| Missing                                                                                         | 138179 | 26.1 | 20.9 (20.7, 21.2) | 2.41 (2.35, 2.47) | 1.11 (1.08, 1.13)     |
| Extent worried that you or someone in immediate family might become seriously ill from COVID-19 |        |      |                   |                   |                       |
| Worried                                                                                         | 209897 | 39.6 | 8.8 (8.6, 9.0)    | 1.0 (NA)          | 1.0 (NA)              |
| Not too worried                                                                                 | 164794 | 31.1 | 13.7 (13.5, 13.9) | 1.55 (1.52, 1.59) | 1.31 (1.28, 1.35)     |
| Not worried at all                                                                              | 98919  | 18.7 | 33.7 (33.3, 34.1) | 3.82 (3.74, 3.91) | 1.78 (1.74, 1.83)     |
| Missing                                                                                         | 56048  | 10.6 | 24.8 (24.3, 25.3) | 2.81 (2.74, 2.89) | 1.30 (1.11, 1.49)     |
| Past-year flu vaccine                                                                           |        |      |                   |                   |                       |
| Yes                                                                                             | 280787 | 53.0 | 5.6 (5.5, 5.7)    | 1.0 (NA)          | 1.0 (NA)              |
| No or unsure                                                                                    | 193242 | 36.5 | 28.3 (28.0, 28.5) | 5.06 (4.94, 5.18) | 3.24 (3.16, 3.32)     |
| Missing                                                                                         | 55629  | 10.5 | 24.9 (24.4, 25.4) | 4.46 (4.33, 4.59) | 2.12 (1.79, 2.45)     |
| Extent intentionally avoiding contact with others                                               |        |      |                   |                   |                       |
| All of the time                                                                                 | 67156  | 12.7 | 11.0 (10.7, 11.3) | 1.0 (NA)          | 1.0 (NA)              |
| Most of the time                                                                                | 142287 | 26.9 | 8.4 (8.2, 8.6)    | 0.76 (0.73, 0.79) | 0.87 (0.84, 0.90)     |
| Some of the time                                                                                | 187201 | 35.3 | 9.0 (8.8, 9.1)    | 0.81 (0.78, 0.84) | 0.88 (0.86, 0.91)     |
| None of the time                                                                                | 85930  | 16.2 | 44.5 (44.1, 45.0) | 4.03 (3.92, 4.15) | 2.43 (2.35, 2.50)     |
| Missing                                                                                         | 47084  | 8.9  | 26.2 (25.6, 26.7) | 2.37 (2.29, 2.45) | 1.46 (1.37, 1.54)     |

---

NA=not applicable

<sup>a</sup> State governor's political party was excluded from the multivariable model due to collinearity with county Trump vote share.

<sup>b</sup> Reliable estimates could not be calculated for the missing category for variables based on participants' zip code, due to collinearity.

<sup>c</sup> "Someone 65 years or older in the home" was evaluated as a binary variable in multivariable analysis, which controlled for participant's age.

**Table 3.** Reasons for not getting the COVID-19 vaccine in May, 2021, by vaccine intent level among US adults (N=90,510)<sup>a</sup>

|                                                 | Likelihood of accepting the COVID-19 vaccine if offered it today |                   |                   |                   |
|-------------------------------------------------|------------------------------------------------------------------|-------------------|-------------------|-------------------|
|                                                 | Hesitant<br>(Definitely/<br>probably not)                        | Definitely not    | Probably not      | Probably yes      |
|                                                 | N = 75792                                                        | N = 48674         | N = 27118         | N = 14718         |
|                                                 | % (95% CI)                                                       |                   |                   |                   |
| Concerned about possible side effects           | 49.2 (48.8, 49.7)                                                | 49.1 (48.6, 49.7) | 49.3 (48.6, 50.1) | 49.3 (48.3, 50.3) |
| Don't trust COVID-19 vaccines                   | 49.1 (48.6, 49.5)                                                | 59.6 (59.0, 60.1) | 29.6 (28.9, 30.3) | 13.1 (12.4, 13.8) |
| Don't trust the government                      | 42.7 (42.2, 43.1)                                                | 52.3 (51.7, 52.8) | 24.8 (24.2, 25.5) | 14.2 (13.4, 14.9) |
| Don't believe I need it                         | 39.0 (38.5, 39.4)                                                | 47.4 (46.9, 48.0) | 23.3 (22.6, 23.9) | 7.6 (7.0, 8.2)    |
| Plan to wait and to see if safe                 | 34.0 (33.6, 34.5)                                                | 24.2 (23.7, 24.8) | 52.2 (51.5, 53.0) | 46.9 (45.9, 47.9) |
| Concerned about an allergic reaction            | 24.2 (23.8, 24.6)                                                | 23.4 (22.9, 23.9) | 25.7 (25.0, 26.3) | 28.5 (27.6, 29.4) |
| Don't know if it will work                      | 22.5 (22.1, 22.9)                                                | 24.0 (23.5, 24.5) | 19.6 (19.0, 20.2) | 17.1 (16.3, 17.9) |
| Don't like vaccines                             | 15.5 (15.1, 15.8)                                                | 18.5 (18.0, 19.0) | 9.9 (9.4, 10.4)   | 7.7 (7.1, 8.3)    |
| Other people need it more                       | 13.0 (12.7, 13.4)                                                | 9.7 (9.3, 10.1)   | 19.2 (18.5, 19.8) | 25.2 (24.2, 26.1) |
| Safety concern because of my health condition   | 12.6 (12.3, 12.9)                                                | 12.2 (11.8, 12.5) | 13.3 (12.9, 13.8) | 13.4 (12.8, 14.1) |
| Doctor has not recommended                      | 10.0 (9.7, 10.3)                                                 | 10.9 (10.5, 11.3) | 8.4 (8.0, 8.8)    | 6.9 (6.4, 7.4)    |
| Against religious beliefs                       | 9.3 (9.0, 9.5)                                                   | 12.5 (12.1, 12.9) | 3.3 (3.0, 3.5)    | 1.2 (1.0, 1.5)    |
| Currently/planning to be pregnant/breastfeeding | 7.2 (7.0, 7.5)                                                   | 7.3 (7.0, 7.6)    | 7.2 (6.8, 7.5)    | 4.9 (4.5, 5.3)    |
| Concerned about cost                            | 3.9 (3.7, 4.2)                                                   | 4.1 (3.8, 4.4)    | 3.7 (3.3, 4.0)    | 8.0 (7.3, 8.6)    |
| Other                                           | 17.6 (17.3, 18.0)                                                | 20.5 (20.0, 20.9) | 12.4 (11.9, 12.8) | 11.8 (11.2, 12.5) |

<sup>a</sup> Excludes adults who already were vaccinated or reported “definitely yes” to intent question.

## Figure Legends

**Figure 1.** COVID-19 vaccine hesitancy by race/ethnicity (ages 18-34 years<sup>a</sup>), education level, US region and county Trump vote share in 2020 presidential election among US adults by month (January-May, 2021)

Between January and May the gap in percent hesitant between race/ethnicity groups among adults 18-34 years (panel A) and education levels among all ages (panel B) decreased, with the biggest decreases among the most hesitant groups (e.g., Black race and  $\leq$ high school education, respectively). Changes in percent hesitant over time were fairly similar across US regions (panel C); however, there was a slightly smaller decrease in the Mountain region and slightly larger decrease in the South versus other regions. The gap in percent hesitant by county political environment, quantified in quartiles of percent Trump vote share in the 2020 presidential election, increased slightly between January and May, with the most hesitant group (highest quartile) having the smallest decrease (panel D).

**Figure 2.** COVID-19 vaccine hesitancy by age group, stratified by race/ethnicity, among US adults, May 2021

Differences in hesitancy by age (e.g., 18-24 year-olds versus 65-74 year-olds) were most pronounced in Blacks (RR=7.23 [95%CI, 5.89, 8.57]) and less pronounced in Asians (RR=2.39 [95% CI 1.01, 3.76 ]; hesitancy <5% in all age groups) versus Whites (RR=2.94 [95% CI 2.79, 3.09]). Differences in hesitancy by race/ethnicity were more pronounced in younger adults and adults  $\geq$  75 years.



## References

1. Loftus P, West MG, Hopkins JS. First Covid-19 Vaccine Given to U.S. Public. MSN. Accessed May 26, 2021. <https://www.msn.com/en-us/news/us/first-covid-19-vaccine-given-to-us-public/ar-BB1bUDkJ>
2. Hinton RDM. Pfizer-BioNTech COVID-19 Vaccine EUA Letter of Authorization reissued. Published online May 10, 2021. Accessed May 26, 2021. <https://www.fda.gov/media/144412/download>
3. Centers for Disease Control and Prevention. COVID Data Tracker. Centers for Disease Control and Prevention. Published March 28, 2020. Accessed May 26, 2021. <https://covid.cdc.gov/covid-data-tracker>
4. Liptak K, Zeleny J, Harwood J. Biden now says US will have enough vaccine for every adult by the end of May. CNN. Accessed May 26, 2021. <https://www.cnn.com/2021/03/02/politics/biden-merck-johnson--johnson-vaccine/index.html>
5. Office of the Commissioner. Pfizer-BioNTech COVID-19 Vaccine. FDA. Published online June 11, 2021. Accessed June 25, 2021. <https://www.fda.gov/emergency-preparedness-and-response/coronavirus-disease-2019-covid-19/pfizer-biontech-covid-19-vaccine>
6. Rearden C. Gov. Wolf announces effort to get COVID-19 vaccines to homebound individuals. WFMZ.com. Accessed May 26, 2021. [https://www.wfmz.com/health/coronavirus/gov-wolf-announces-effort-to-get-covid-19-vaccines-to-homebound-individuals/article\\_f13537dc-a6d6-11eb-a00c-5f21dab164af.html](https://www.wfmz.com/health/coronavirus/gov-wolf-announces-effort-to-get-covid-19-vaccines-to-homebound-individuals/article_f13537dc-a6d6-11eb-a00c-5f21dab164af.html)
7. Pietsch B. Dracula's Castle Is Now a Vaccination Site - The New York Times. Published May 12, 2021. Accessed June 25, 2021. <https://www.nytimes.com/2021/05/12/us/covid-vaccine-unusual-location.html>
8. Daly M, Jones A, Robinson E. Public Trust and Willingness to Vaccinate Against COVID-19 in the US From October 14, 2020, to March 29, 2021. *JAMA*. 2021;325(23):2397. doi:10.1001/jama.2021.8246
9. Delphi Group. COVID Symptom Survey. Delphi Epidata API. Accessed July 9, 2021. <https://cmu-delphi.github.io/delphi-epidata/symptom-survey/>
10. Barkay N, Cobb C, Eilat R, et al. Weights and Methodology Brief for the COVID-19 Symptom Survey by University of Maryland and Carnegie Mellon University, in Partnership with Facebook. *arXiv:200914675 [cs]*. Published online October 6, 2020. Accessed May 26, 2021. <http://arxiv.org/abs/2009.14675>
11. Rentsch CT, Kidwai-Khan F, Tate JP, et al. Patterns of COVID-19 testing and mortality by race and ethnicity among United States veterans: A nationwide cohort study. *PLoS Med*. 2020;17(9):e1003379. doi:10.1371/journal.pmed.1003379
12. Lopez-Villafana A. Black nurses bring vaccine to community centers, churches to target underserved people. San Diego Union-Tribune. Published March 17, 2021. Accessed June 25, 2021.

<https://www.sandiegouniontribune.com/communities/san-diego/story/2021-03-17/san-diegos-black-nurses-focus-on-vaccinating-black-residents-in-southeastern-san-diego>

13. Pham O, Jul 08 NPP, 2021. Latest Data on COVID-19 Vaccinations by Race/Ethnicity. KFF. Published July 8, 2021. Accessed July 9, 2021. <https://www.kff.org/coronavirus-covid-19/issue-brief/latest-data-on-covid-19-vaccinations-race-ethnicity/>
14. Fisher KA, Bloomstone SJ, Walder J, Crawford S, Fouayzi H, Mazor KM. Attitudes Toward a Potential SARS-CoV-2 Vaccine: A Survey of U.S. Adults. *Ann Intern Med*. 2020;173(12):964-973. doi:10.7326/M20-3569
15. Reiter PL, Pennell ML, Katz ML. Acceptability of a COVID-19 vaccine among adults in the United States: How many people would get vaccinated? *Vaccine*. 2020;38(42):6500-6507. doi:10.1016/j.vaccine.2020.08.043
16. Head KJ, Kasting ML, Sturm LA, Hartsock JA, Zimet GD. A National Survey Assessing SARS-CoV-2 Vaccination Intentions: Implications for Future Public Health Communication Efforts. *Science Communication*. 2020;42(5):698-723. doi:10.1177/1075547020960463
17. Szilagyi PG, Thomas K, Shah MD, et al. National Trends in the US Public's Likelihood of Getting a COVID-19 Vaccine—April 1 to December 8, 2020. *JAMA*. 2021;325(4):396. doi:10.1001/jama.2020.26419
18. Ten health issues WHO will tackle this year. World Health Organization. Accessed June 25, 2021. <https://www.who.int/news-room/spotlight/ten-threats-to-global-health-in-2019>
19. Wallace A. An Epidemic of Fear: How Panicked Parents Skipping Shots Endanger Us All. *Wired*. 2009;17(11). Accessed June 25, 2021. <https://www.wired.com/2009/10/ff-waronscience/>
20. US Census Bureau. American Community Survey 5-Year Data (2009-2019). The United States Census Bureau. Accessed June 27, 2021. <https://www.census.gov/data/developers/data-sets/acs-5year.html>
21. Lessler J, Grabowski MK, Grantz KH, et al. Household COVID-19 risk and in-person schooling. *Science*. 2021;372(6546):1092-1097. doi:10.1126/science.abh2939
22. Institute for Health Metrics and Evaluation. IHME | COVID-19 Projections. Institute for Health Metrics and Evaluation. Accessed July 9, 2021. <https://covid19.healthdata.org/>

A

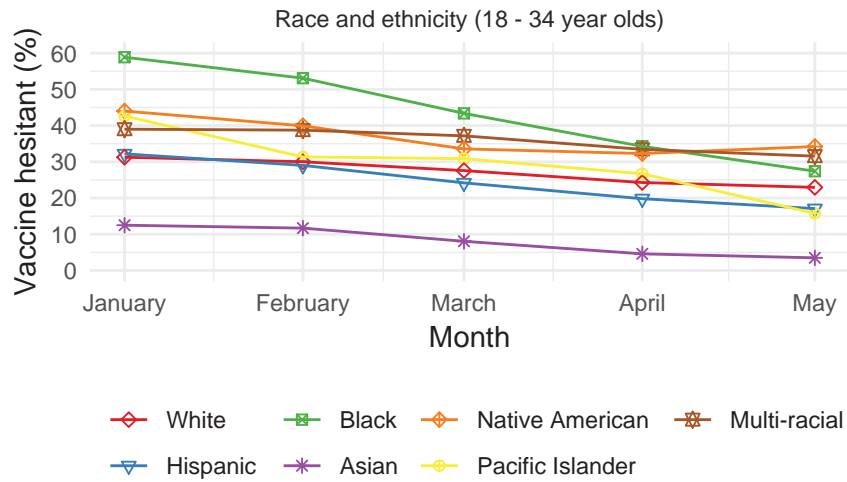

B

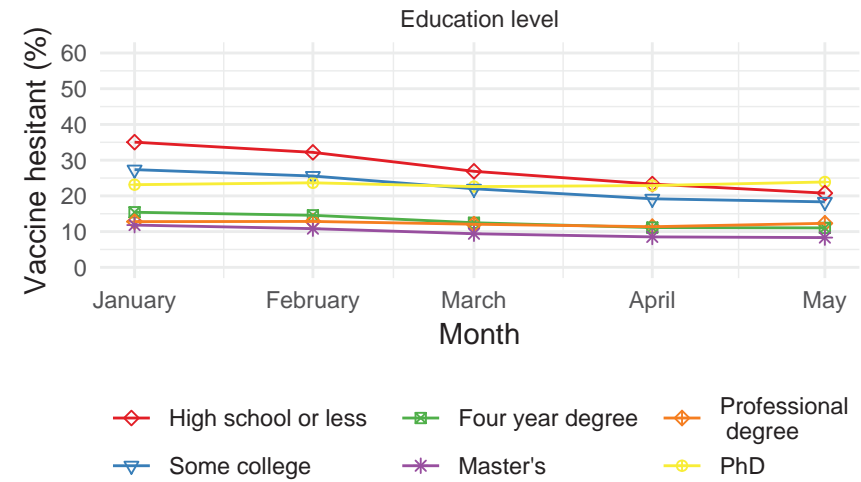

C

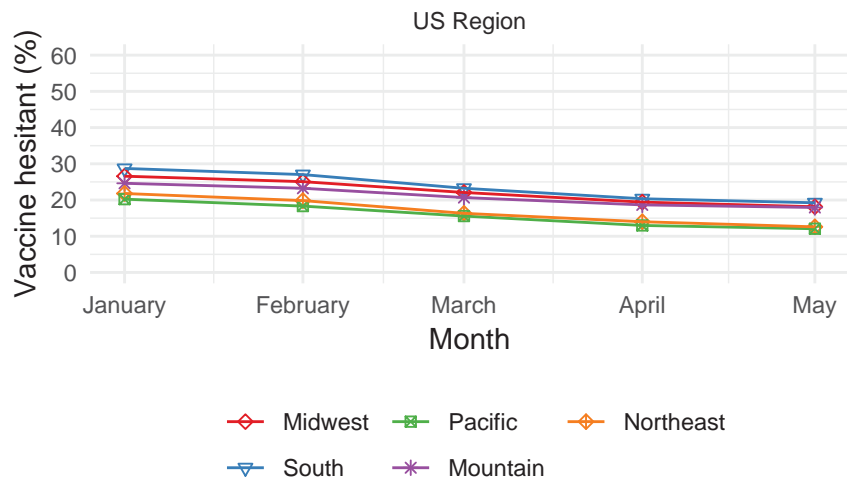

D

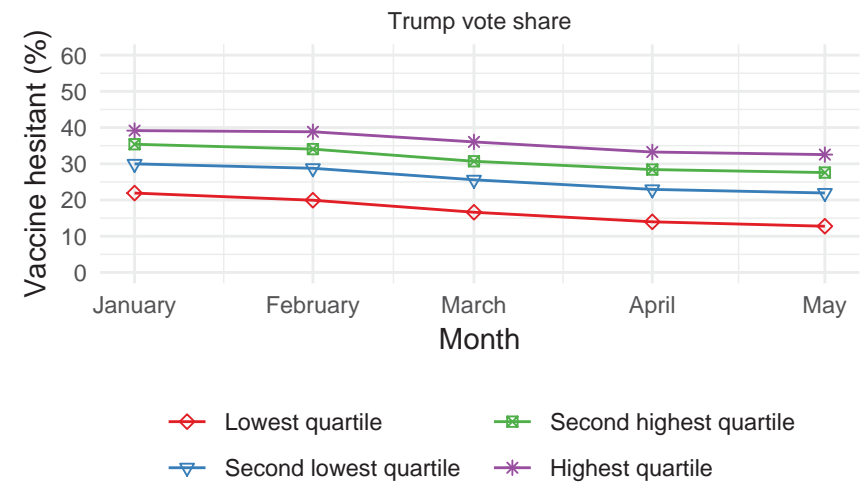

# Race/ethnicity

## White

## Hispanic

## Black

## Asian

## Native American

## Pacific Islander

75 or more years  
65-74 years  
55-64 years  
45-54 years  
35-44 years  
25-34 years  
18-24 years

75 or more years  
65-74 years  
55-64 years  
45-54 years  
35-44 years  
25-34 years  
18-24 years

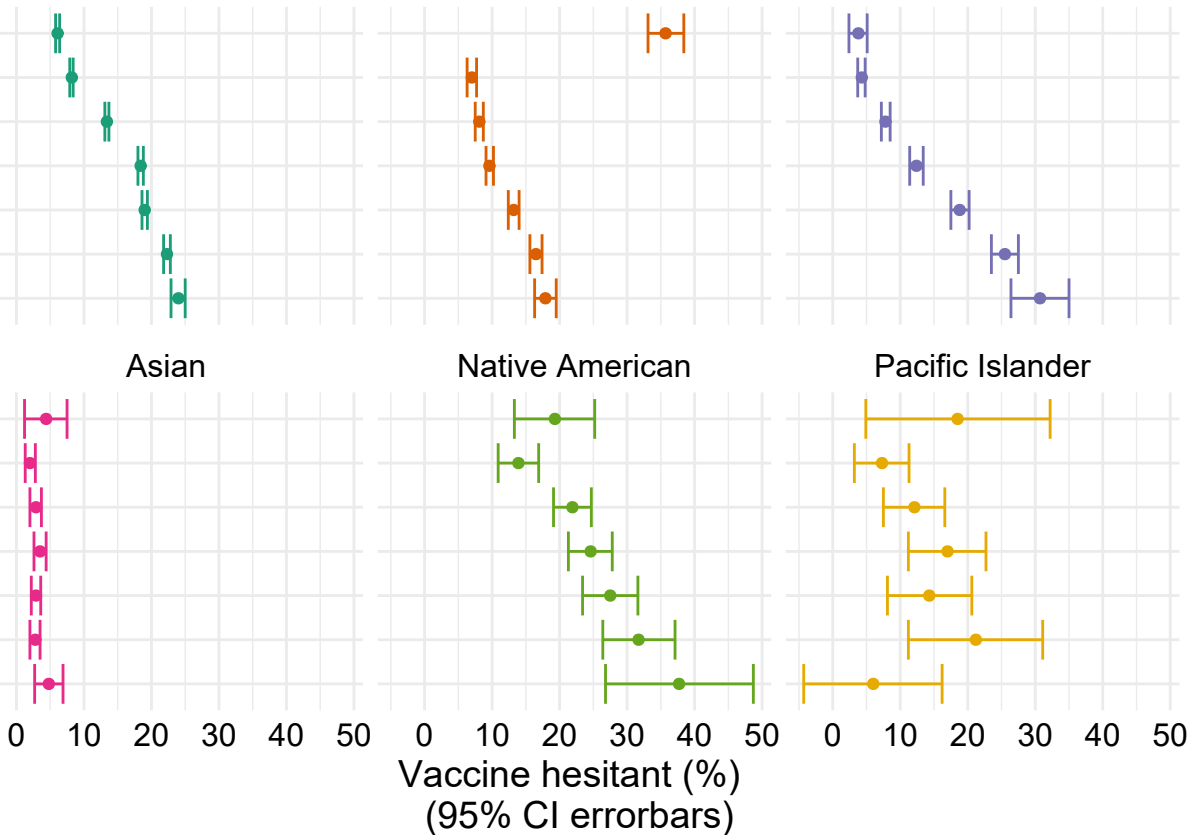

Source: https://medrxiv.org/content/medrxiv/early/2021/07/23/2021.07.20.21260795.full.pdf
